# Supplementary material
Source: PubMed Central journal article supplement (PMC4057962)
Supplement: NIHMS542663-supplement-supplement_1.pdf [file NIHMS542663-supplement-supplement_1.pdf]

Supplementary Table 1: CSF biomarker indices for patients in the PCA group based on clinical diagnosis at last documented clinic visit

|                      | Diagnosis at last clinic visit |                 | <i>t</i> (10) |
|----------------------|--------------------------------|-----------------|---------------|
|                      | PCA                            | Other           |               |
| N                    | 8                              | 4               |               |
| A $\beta$ 42 (pg/ml) | 257.42 (55.88)                 | 261.05 (44.33)  | 0.11          |
| t-tau (pg/ml)        | 331.18 (52.04)                 | 394.75 (100.10) | 1.48          |
| p-tau (pg/ml)        | 51.95 (9.85)                   | 52.49 (9.90)    | 0.09‡         |
| ATI                  | 0.41 (0.09)                    | 0.37 (0.06)     | -0.70         |

Parentheses denote standard deviations. ‡*t*(9) due to missing data from one patient with a diagnosis of PCA at their last clinic visit.

Supplementary Table 2: Semi-quantitative imaging analyses of regional FDG PET hypometabolism in PCA patients with and without CSF biomarker data

|                  | PCA Without CSF | PCA With CSF | <i>t</i> (12) |
|------------------|-----------------|--------------|---------------|
| N                | 8               | 6            | --            |
| <i>Frontal</i>   |                 |              |               |
| Right            | 0.12 (0.35)     | 0.17 (0.41)  | -0.20         |
| Left             | 0.12 (0.35)     | 0.17 (0.41)  | -0.20         |
| <i>Temporal</i>  |                 |              |               |
| Right            | 0.88 (0.84)     | 1.67 (1.03)  | -1.59         |
| Left             | 0.88 (0.84)     | 1.50 (1.23)  | -1.14         |
| <i>Parietal</i>  |                 |              |               |
| Right            | 1.12 (0.84)     | 1.67 (0.52)  | -1.39         |
| Left             | 1.25 (1.04)     | 1.33 (1.03)  | -0.15         |
| <i>Occipital</i> |                 |              |               |
| Right            | 0.25 (0.46)     | 0.33 (0.52)  | -0.32         |
| Left             | 0.25 (0.46)     | 0.67 (0.52)  | -1.59         |

Parentheses denote standard deviations.
